# Supplementary material for: Co-consumption of Vegetables and Fruit, Whole Grains, and Fiber Reduces the Cancer Risk of Red and Processed Meat in a Large Prospective Cohort of Adults from Alberta’s Tomorrow Project
Source: PubMed Central journal article supplement (PMC7468967; doi:10.3390/nu12082265), 2020-07-29
Supplement: nutrients-12-02265-s001.pdf [file nutrients-12-02265-s001.pdf]

Supplementary Table S1. Estimated hazard ratios<sup>a</sup> for all-cause and 15 cancer incidence and estimated median ages<sup>b</sup> of cancer occurrence for different tertile combinations of intake levels for red and processed meat with vegetables and fruit, whole grains and fiber among men, Alberta's Tomorrow Project (n=9,825)

|                            |          | All-cause cancers <sup>c</sup>   |                            |                            | 15 cancers <sup>d</sup>          |                            |                     |
|----------------------------|----------|----------------------------------|----------------------------|----------------------------|----------------------------------|----------------------------|---------------------|
|                            |          | Vegetables & fruit (serving/day) |                            |                            | Vegetables & fruit (serving/day) |                            |                     |
|                            |          | <2.7                             | 2.7-4.6                    | >4.6                       | <2.7                             | 2.7-4.6                    | >4.6                |
| Red meat (gram/week)       |          |                                  |                            |                            |                                  |                            |                     |
| <282                       | HR (CI)  | <b>1.31 (1.02-1.67)</b>          | <b>1.14 (1.01-1.29)</b>    | Ref.                       | 1.25 (0.96-1.63)                 | 1.12 (0.98-1.28)           | Ref.                |
|                            | Age (CI) | <b>73.44 (71.59-75.34)</b>       | <b>75.26 (73.25-77.33)</b> | 75.09 (73.12-77.10)        | 76.03 (73.88-78.23)              | 78.02 (75.68-80.43)        | 77.34 (75.09-79.67) |
| 282-498                    | HR (CI)  | <b>1.29 (1.05-1.59)</b>          | 1.14 (0.98-1.32)           | 1.01 (0.89-1.14)           | <b>1.34 (1.08-1.68)</b>          | 1.15 (0.98-1.35)           | 0.99 (0.86-1.14)    |
|                            | Age (CI) | <b>72.10 (70.19-74.07)</b>       | 72.60 (70.77-74.47)        | 73.79 (71.90-75.73)        | <b>74.42 (72.21-76.69)</b>       | 74.90 (72.80-77.07)        | 76.74 (74.52-79.03) |
| >499                       | HR (CI)  | <b>1.28 (1.00-1.63)</b>          | 1.14 (0.92-1.40)           | 1.02 (0.79-1.30)           | <b>1.45 (1.12-1.87)</b>          | 1.19 (0.95-1.50)           | 0.98 (0.75-1.29)    |
|                            | Age (CI) | <b>71.01 (69.04-73.04)</b>       | 74.16 (72.15-76.23)        | 73.22 (71.43-75.06)        | <b>72.82 (70.59-75.12)</b>       | 76.57 (74.25-78.95)        | 76.06 (73.96-78.23) |
| Processed meat (gram/week) |          |                                  |                            |                            |                                  |                            |                     |
| <81                        | HR (CI)  | <b>1.29 (1.01-1.65)</b>          | <b>1.14 (1.01-1.29)</b>    | Ref.                       | 1.27 (0.98-1.65)                 | 1.13 (0.99-1.28)           | Ref.                |
|                            | Age (CI) | <b>73.03 (71.17-74.95)</b>       | <b>75.23 (73.27-77.24)</b> | 75.64 (73.67-77.67)        | 75.46 (73.3-77.69)               | 77.85 (75.58-80.20)        | 77.91 (75.64-80.25) |
| 81-180                     | HR (CI)  | <b>1.44 (1.17-1.77)</b>          | <b>1.28 (1.11-1.48)</b>    | <b>1.14 (1.01-1.29)</b>    | <b>1.45 (1.16-1.80)</b>          | <b>1.25 (1.07-1.46)</b>    | 1.08 (0.95-1.23)    |
|                            | Age (CI) | <b>73.28 (71.32-75.29)</b>       | <b>72.44 (70.61-74.32)</b> | <b>73.75 (71.87-75.69)</b> | <b>75.29 (73.06-77.59)</b>       | <b>75.00 (72.87-77.20)</b> | 76.46 (74.26-78.73) |
| >180                       | HR (CI)  | <b>1.61 (1.28-2.02)</b>          | <b>1.45 (1.18-1.77)</b>    | <b>1.30 (1.02-1.66)</b>    | <b>1.65 (1.29-2.11)</b>          | <b>1.38 (1.12-1.72)</b>    | 1.16 (0.90-1.51)    |
|                            | Age (CI) | <b>70.62 (68.76-72.54)</b>       | <b>74.26 (72.24-76.34)</b> | <b>72.80 (71.03-74.61)</b> | <b>73.01 (70.85-75.23)</b>       | <b>76.5 (74.19-78.89)</b>  | 75.93 (73.84-78.09) |
|                            |          | Whole grains (serving/day)       |                            |                            | Whole grains (serving/day)       |                            |                     |
|                            |          | <0.75                            | 0.75-1.5                   | >1.5                       | <0.75                            | 0.75-1.5                   | >1.5                |
| Red meat (gram/week)       |          |                                  |                            |                            |                                  |                            |                     |
| <282                       | HR (CI)  | 1.20 (0.94-1.52)                 | 1.09 (0.97-1.23)           | Ref.                       | 1.29 (1.00-1.67)                 | 1.135 (1.00-1.29)          | Ref.                |
|                            | Age (CI) | 73.40 (71.51-75.33)              | 75.06 (73.07-77.09)        | 75.20 (73.28-77.16)        | 76.03 (73.85-78.28)              | 77.72 (75.42-80.09)        | 77.79 (75.57-80.08) |
| 283-498                    | HR (CI)  | 1.07 (0.87-1.30)                 | 1.09 (0.94-1.26)           | 1.11 (0.98-1.26)           | 1.20 (0.97-1.48)                 | 1.17 (1.00-1.36)           | 1.14 (0.99-1.30)    |
|                            | Age (CI) | 72.09 (70.12-74.11)              | 72.71 (70.88-74.60)        | 73.60 (71.78-75.47)        | 74.53 (72.26-76.88)              | 75.19 (73.07-77.38)        | 76.38 (74.24-78.57) |
| >499                       | HR (CI)  | 0.95 (0.75-1.20)                 | 1.09 (0.88-1.33)           | 1.24 (0.97-1.59)           | 1.11 (0.87-1.43)                 | 1.20 (0.96-1.50)           | 1.29 (0.99-1.69)    |
|                            | Age (CI) | 72.59 (70.66-74.56)              | 71.92 (69.99-73.90)        | 73.98 (72.12-75.88)        | 74.61 (72.42-76.87)              | 74.65 (72.40-76.97)        | 76.56 (74.40-78.77) |
| Processed meat (gram/week) |          |                                  |                            |                            |                                  |                            |                     |
| <81                        | HR (CI)  | 0.97 (0.76-1.23)                 | 0.98 (0.87-1.11)           | Ref.                       | 1.06 (0.82-1.37)                 | 1.03 (0.90-1.17)           | Ref.                |
|                            | Age (CI) | 73.77 (71.87-75.71)              | 74.86 (72.92-76.86)        | 75.11 (73.18-77.09)        | 76.28 (74.09-78.54)              | 77.33 (75.08-79.65)        | 77.62 (75.39-79.93) |
| 81-180                     | HR (CI)  | 1.09 (0.90-1.33)                 | 1.11 (0.97-1.29)           | <b>1.14 (1.01-1.28)</b>    | 1.19 (0.96-1.47)                 | 1.15 (0.98-1.34)           | 1.11 (0.98-1.26)    |
|                            | Age (CI) | 73.10 (71.14-75.11)              | 72.82 (70.97-74.72)        | <b>73.49 (71.64-75.39)</b> | 75.43 (73.18-77.76)              | 75.36 (73.21-77.57)        | 75.99 (73.84-78.2)  |
| >180                       | HR (CI)  | 1.24 (0.98-1.56)                 | <b>1.26 (1.04-1.54)</b>    | <b>1.29 (1.02-1.63)</b>    | <b>1.33 (1.04-1.70)</b>          | <b>1.28 (1.04-1.59)</b>    | 1.23 (0.96-1.59)    |
|                            | Age (CI) | 70.92 (69.03-72.86)              | <b>72.00 (70.08-73.98)</b> | <b>74.03 (72.25-75.85)</b> | <b>73.11 (70.95-75.34)</b>       | <b>74.81 (72.56-77.14)</b> | 76.92 (74.82-79.07) |
|                            |          | Fiber (gram/week)                |                            |                            | Fiber (gram/week)                |                            |                     |
|                            |          | <121                             | 121-173                    | >173                       | <121                             | 121-173                    | >173                |
| Red meat (gram/week)       |          |                                  |                            |                            |                                  |                            |                     |

|                            |          |                            |                            |                            |                            |                            |                     |
|----------------------------|----------|----------------------------|----------------------------|----------------------------|----------------------------|----------------------------|---------------------|
| <282                       | HR (CI)  | <b>1.31 (1.02-1.69)</b>    | <b>1.14 (1.01-1.30)</b>    | Ref.                       | 1.25 (0.96-1.64)           | 1.12 (0.98-1.28)           | Ref.                |
|                            | Age (CI) | <b>73.48 (71.62-75.38)</b> | <b>73.78 (71.85-75.77)</b> | 75.94 (73.79-78.15)        | 75.87 (73.73-78.07)        | 76.43 (74.18-78.74)        | 78.11 (75.66-80.64) |
| 283-498                    | HR (CI)  | <b>1.25 (1.00-1.57)</b>    | 1.14 (0.98-1.33)           | 1.04 (0.92-1.19)           | <b>1.37 (1.08-1.73)</b>    | 1.16 (0.98-1.37)           | 0.98 (0.85-1.13)    |
|                            | Age (CI) | <b>72.03 (70.04-74.07)</b> | 71.96 (70.17-73.79)        | 74.07 (72.18-76.02)        | <b>74.23 (71.95-76.58)</b> | 74.24 (72.18-76.36)        | 77.01 (74.78-79.30) |
| >499                       | HR (CI)  | 1.20 (0.92-1.57)           | 1.14 (0.92-1.42)           | 1.09 (0.84-1.42)           | <b>1.50 (1.13-1.98)</b>    | 1.20 (0.95-1.51)           | 0.96 (0.73-1.27)    |
|                            | Age (CI) | 71.92 (69.62-74.29)        | 71.68 (69.81-73.60)        | 74.33 (72.51-76.19)        | <b>73.42 (70.87-76.06)</b> | 73.82 (71.68-76.02)        | 77.44 (75.29-79.64) |
| Processed meat (gram/week) |          |                            |                            |                            |                            |                            |                     |
| <81                        | HR (CI)  | <b>1.30 (1.01-1.69)</b>    | <b>1.14 (1.00-1.30)</b>    | Ref.                       | <b>1.33 (1.01-1.75)</b>    | <b>1.15 (1.01-1.32)</b>    | Ref.                |
|                            | Age (CI) | <b>73.21 (71.34-75.14)</b> | <b>73.85 (71.95-75.8)</b>  | 76.41 (74.28-78.59)        | <b>75.48 (73.31-77.71)</b> | <b>76.24 (74.05-78.51)</b> | 78.84 (76.39-81.37) |
| 81-180                     | HR (CI)  | <b>1.40 (1.12-1.75)</b>    | <b>1.29 (1.11-1.50)</b>    | <b>1.18 (1.05-1.34)</b>    | <b>1.49 (1.18-1.89)</b>    | <b>1.28 (1.10-1.50)</b>    | 1.10 (0.96-1.25)    |
|                            | Age (CI) | <b>72.86 (70.86-74.90)</b> | <b>72.11 (70.28-73.98)</b> | <b>74.02 (72.13-75.96)</b> | <b>74.79 (72.52-77.12)</b> | <b>74.44 (72.34-76.61)</b> | 76.90 (74.68-79.19) |
| >180                       | HR (CI)  | <b>1.51 (1.18-1.93)</b>    | <b>1.45 (1.18-1.79)</b>    | <b>1.40 (1.10-1.80)</b>    | <b>1.67 (1.28-2.17)</b>    | <b>1.42 (1.14-1.77)</b>    | 1.21 (0.93-1.57)    |
|                            | Age (CI) | <b>71.63 (69.48-73.84)</b> | <b>71.33 (69.49-73.22)</b> | <b>73.93 (72.14-75.77)</b> | <b>73.87 (71.41-76.41)</b> | <b>73.66 (71.53-75.85)</b> | 77.04 (74.93-79.22) |

Abbreviations: CI, confidence interval; HR, hazard ratio.

a. Adjusted for total energy intake, smoking status, alcohol use, family history of cancer, personal history of chronic disease, rural/urban residence, Body Mass Index, physical activity, and education.

b. Adjusted for total energy intake, smoking status, alcohol use, family history of cancer, personal history of chronic disease, rural/urban residence, BMI, physical activity, and age at enrollment.

c. Primary malignant cancers, excluding non-melanoma skin cancer.

d. 15 cancers with possible links to red and processed meat intake, including colorectal, stomach, pancreas, prostate, breast, bronchus/lung, esophagus, kidney, bladder, ovary, endometrium, non-Hodgkin lymphoma, liver and intrahepatic bile ducts, leukemia, other (thyroid, gallbladder and biliary tract, testis, brain).<sup>11</sup>

Supplementary Table S2. Estimated hazard ratios<sup>a</sup> for all-cause and 15 cancer incidence and estimated median ages<sup>b</sup> of cancer occurrence for different tertile combinations of intake levels for red and processed meat with vegetables and fruit, whole grains and fiber among women, Alberta's Tomorrow Project (n=16,393)

|                            |          | All-cause cancers <sup>c</sup>   |                            |                     | 15 cancers <sup>d</sup>          |                            |                     |
|----------------------------|----------|----------------------------------|----------------------------|---------------------|----------------------------------|----------------------------|---------------------|
|                            |          | Vegetables & fruit (serving/day) |                            |                     | Vegetables & fruit (serving/day) |                            |                     |
|                            |          | <3.2                             | 3.2-5.4                    | >5.4                | <3.2                             | 3.2-5.4                    | >5.4                |
| Red meat (gram/week)       |          |                                  |                            |                     |                                  |                            |                     |
| <163                       | HR (CI)  | 1.19 (0.97-1.45)                 | 1.09 (0.99-1.20)           | Ref.                | 1.11 (0.89-1.37)                 | 1.05 (0.94-1.17)           | Ref.                |
|                            | Age (CI) | 74.96 (73.18-76.78)              | 77.14 (75.18-79.15)        | 76.13 (74.31-77.99) | 77.69 (75.62-79.82)              | 79.48 (77.23-81.79)        | 78.15 (76.09-80.27) |
| 163-294                    | HR (CI)  | 1.16 (0.98-1.38)                 | 1.08 (0.95-1.23)           | 1.00 (0.90-1.12)    | 1.12 (0.93-1.35)                 | 1.06 (0.93-1.22)           | 1.01 (0.90-1.14)    |
|                            | Age (CI) | 74.00 (72.16-75.88)              | 75.47 (73.68-77.30)        | 76.74 (74.89-78.63) | 76.57 (74.45-78.76)              | 77.71 (75.66-79.81)        | 79.72 (77.55-81.94) |
| >294                       | HR (CI)  | 1.14 (0.93-1.39)                 | 1.07 (0.89-1.28)           | 1.01 (0.81-1.26)    | 1.13 (0.91-1.41)                 | 1.08 (0.89-1.31)           | 1.02 (0.80-1.30)    |
|                            | Age (CI) | 73.69 (71.74-75.69)              | 74.86 (73.13-76.64)        | 78.05 (76.15-80.00) | 75.58 (73.39-77.84)              | 77.75 (75.71-79.84)        | 80.51 (78.32-82.76) |
| Processed meat (gram/week) |          |                                  |                            |                     |                                  |                            |                     |
| <37                        | HR (CI)  | 1.22 (0.98-1.51)                 | 1.10 (0.99-1.23)           | Ref.                | 1.10 (0.88-1.39)                 | 1.05 (0.94-1.18)           | Ref.                |
|                            | Age (CI) | 76.76 (74.80-78.78)              | 76.87 (75.02-78.77)        | 77.22 (75.41-79.07) | 79.87 (77.56-82.24)              | 79.53 (77.38-81.73)        | 79.63 (77.55-81.77) |
| 37-87                      | HR (CI)  | <b>1.25 (1.05-1.49)</b>          | <b>1.17 (1.03-1.32)</b>    | 1.09 (0.98-1.21)    | <b>1.22 (1.01-1.47)</b>          | <b>1.16 (1.01-1.33)</b>    | 1.11 (0.99-1.25)    |
|                            | Age (CI) | <b>74.17 (72.41-75.97)</b>       | <b>76.28 (74.45-78.17)</b> | 76.30 (74.43-78.22) | <b>76.70 (74.68-78.79)</b>       | <b>78.80 (76.68-80.98)</b> | 78.57 (76.43-80.77) |
| >87                        | HR (CI)  | <b>1.29 (1.06-1.57)</b>          | <b>1.24 (1.04-1.47)</b>    | 1.19 (0.96-1.47)    | <b>1.342 (1.09-1.65)</b>         | <b>1.29 (1.07-1.55)</b>    | 1.23 (0.98-1.55)    |
|                            | Age (CI) | <b>72.38 (70.59-74.22)</b>       | <b>74.24 (72.49-76.04)</b> | 77.10 (75.26-78.99) | <b>74.26 (72.24-76.34)</b>       | <b>76.6 (74.58-78.68)</b>  | 79.73 (77.59-81.92) |
|                            |          | Whole grains (serving/day)       |                            |                     | Whole grains (serving/day)       |                            |                     |
|                            |          | <0.6                             | 0.6-1.1                    | >1.1                | <0.6                             | 0.6-1.1                    | >1.1                |
| Red meat (gram/week)       |          |                                  |                            |                     |                                  |                            |                     |
| <163                       | HR (CI)  | 0.94 (0.77-1.15)                 | 0.97 (0.88-1.07)           | Ref.                | 1.02 (0.83-1.26)                 | 1.01 (0.91-1.12)           | Ref.                |
|                            | Age (CI) | 75.50 (73.66-77.38)              | 76.28 (74.42-78.18)        | 76.41 (74.60-78.28) | 77.94 (75.82-80.12)              | 78.62 (76.48-80.81)        | 78.64 (76.56-80.78) |
| 163-294                    | HR (CI)  | 0.98 (0.83-1.15)                 | 0.96 (0.85-1.08)           | 0.94 (0.84-1.04)    | 1.10 (0.93-1.32)                 | 1.01 (0.89-1.15)           | 0.93 (0.83-1.04)    |
|                            | Age (CI) | 74.23 (72.39-76.12)              | 75.71 (73.87-77.6)         | 76.37 (74.58-78.20) | 76.59 (74.46-78.77)              | 78.10 (75.99-80.28)        | 79.21 (77.12-81.35) |
| >294                       | HR (CI)  | 1.02 (0.84-1.23)                 | 0.95 (0.80-1.12)           | 0.88 (0.71-1.09)    | 1.20 (0.98-1.47)                 | 1.02 (0.85-1.22)           | 0.86 (0.69-1.09)    |
|                            | Age (CI) | 73.73 (71.88-75.62)              | 75.56 (73.71-77.47)        | 77.46 (75.61-79.35) | 75.71 (73.62-77.86)              | 78.16 (76.01-80.38)        | 80.17 (78.02-82.38) |
| Processed meat (gram/week) |          |                                  |                            |                     |                                  |                            |                     |
| <37                        | HR (CI)  | 0.82 (0.66-1.01)                 | 0.90 (0.81-1.00)           | Ref.                | 1.00 (0.80-1.25)                 | 1.00 (0.89-1.12)           | Ref.                |
|                            | Age (CI) | 76.46 (74.58-78.39)              | 77.87 (75.94-79.85)        | 76.97 (75.17-78.82) | 79.20 (77.00-81.45)              | 80.32 (78.10-82.60)        | 79.77 (77.66-81.93) |
| 37-87                      | HR (CI)  | 0.98 (0.83-1.17)                 | 0.97 (0.85-1.09)           | 0.95 (0.86-1.05)    | <b>1.21 (1.01-1.46)</b>          | 1.12 (0.98-1.27)           | 1.03 (0.92-1.15)    |
|                            | Age (CI) | 73.90 (72.15-75.70)              | 75.51 (73.72-77.34)        | 77.63 (75.71-79.59) | <b>76.38 (74.35-78.47)</b>       | 77.78 (75.73-79.88)        | 80.11 (77.91-82.37) |
| >87                        | HR (CI)  | 1.19 (0.98-1.44)                 | 1.03 (0.87-1.23)           | 0.90 (0.73-1.11)    | <b>1.47 (1.19-1.80)</b>          | <b>1.25 (1.04-1.50)</b>    | 1.06 (0.86-1.32)    |
|                            | Age (CI) | 73.49 (71.62-75.41)              | 74.40 (72.59-76.24)        | 75.75 (74.03-77.51) | <b>75.11 (73.01-77.26)</b>       | <b>77.04 (74.94-79.20)</b> | 78.20 (76.22-80.24) |
|                            |          | Fiber (gram/week)                |                            |                     | Fiber (gram/week)                |                            |                     |
|                            |          | <105                             | 105-150                    | >150                | <105                             | 105-150                    | >150                |
| Red meat (gram/week)       |          |                                  |                            |                     |                                  |                            |                     |

|                            |          |                            |                            |                     |                            |                            |                     |
|----------------------------|----------|----------------------------|----------------------------|---------------------|----------------------------|----------------------------|---------------------|
| <163                       | HR (CI)  | 1.10 (0.89-1.36)           | 1.05 (0.94-1.16)           | Ref.                | 1.06 (0.84-1.33)           | 1.03 (0.92-1.15)           | Ref.                |
|                            | Age (CI) | 74.04 (72.24-75.89)        | 74.99 (73.15-76.88)        | 76.93 (75.04-78.88) | 76.83 (74.73-79.00)        | 77.05 (74.95-79.21)        | 79.23 (77.06-81.46) |
| 163-294                    | HR (CI)  | 1.15 (0.96-1.38)           | 1.03 (0.91-1.17)           | 0.93 (0.84-1.04)    | 1.13 (0.93-1.38)           | 1.04 (0.91-1.19)           | 0.96 (0.85-1.07)    |
|                            | Age (CI) | 72.54 (70.70-74.42)        | 74.92 (73.15-76.73)        | 77.10 (75.25-78.99) | 75.16 (73.03-77.36)        | 77.43 (75.38-79.53)        | 79.78 (77.64-81.98) |
| >294                       | HR (CI)  | 1.20 (0.97-1.49)           | 1.02 (0.86-1.22)           | 0.87 (0.70-1.07)    | 1.21 (0.96-1.51)           | 1.05 (0.87-1.27)           | 0.91 (0.73-1.15)    |
|                            | Age (CI) | 72.07 (70.03-74.17)        | 74.28 (72.51-76.09)        | 78.48 (76.63-80.37) | 74.20 (71.87-76.60)        | 76.95 (74.89-79.06)        | 80.95 (78.82-83.13) |
| Processed meat (gram/week) |          |                            |                            |                     |                            |                            |                     |
| <37                        | HR (CI)  | 1.17 (0.94-1.46)           | 1.08 (0.97-1.21)           | Ref.                | 1.12 (0.87-1.43)           | 1.06 (0.94-1.19)           | Ref.                |
|                            | Age (CI) | 75.40 (73.46-77.38)        | 76.07 (74.22-77.97)        | 77.27 (75.46-79.13) | 78.38 (76.12-80.72)        | 78.78 (76.63-81.00)        | 79.78 (77.68-81.92) |
| 37-87                      | HR (CI)  | <b>1.26 (1.05-1.52)</b>    | <b>1.15 (1.01-1.30)</b>    | 1.04 (0.94-1.16)    | <b>1.25 (1.02-1.53)</b>    | <b>1.17 (1.02-1.34)</b>    | 1.09 (0.97-1.22)    |
|                            | Age (CI) | <b>73.12 (71.32-74.96)</b> | <b>74.51 (72.79-76.28)</b> | 78.03 (76.04-80.07) | <b>76.05 (73.94-78.21)</b> | <b>76.50 (74.54-78.50)</b> | 80.61 (78.31-82.97) |
| >87                        | HR (CI)  | <b>1.35 (1.10-1.65)</b>    | <b>1.21 (1.02-1.44)</b>    | 1.09 (0.88-1.34)    | <b>1.40 (1.13-1.75)</b>    | <b>1.29 (1.07-1.56)</b>    | 1.19 (0.95-1.49)    |
|                            | Age (CI) | <b>70.81 (68.95-72.73)</b> | <b>73.92 (72.12-75.76)</b> | 77.24 (75.47-79.05) | <b>72.66 (70.55-74.83)</b> | <b>76.60 (74.51-78.76)</b> | 79.54 (77.51-81.63) |

Abbreviations: CI, confidence interval; HR, hazard ratio.

a. Adjusted for total energy intake, smoking status, alcohol use, family history of cancer, personal history of chronic disease, rural/urban residence, Body Mass Index, physical activity, and education.

b. Adjusted for total energy intake, smoking status, alcohol use, family history of cancer, personal history of chronic disease, rural/urban residence, BMI, physical activity, and age at enrollment.

c. Primary malignant cancers, excluding non-melanoma skin cancer.

d. 15 cancers with possible links to red and processed meat intake, including colorectal, stomach, pancreas, prostate, breast, bronchus/lung, esophagus, kidney, bladder, ovary, endometrium, non-Hodgkin lymphoma, liver and intrahepatic bile ducts, leukemia, other (thyroid, gallbladder and biliary tract, testis, brain).<sup>11</sup>
